# Supplementary material for: Investigation of the Genotoxic, Antigenotoxic and Antioxidant Profile of Different Extracts from Equisetum arvense L
Source: MDPI journal article supplement (doi:10.3390/antiox11071393), 2022-07-18
Supplement: s1 [file s1]

# Supplementary Materials

## Investigation of the Genotoxic, Antigenotoxic and Antioxidant Profile of Different Extracts from *Equisetum arvense* L.

Margarita Dormousoglou <sup>1</sup>, Ioanna Efthimiou <sup>1,2</sup>, Maria Antonopoulou <sup>1</sup>, Damian L. Fetzter <sup>3</sup>, Fabiane Hamerski <sup>3</sup>, Marcos L. Corazza <sup>3</sup>, Maria Papadaki <sup>1</sup>, Samir Santzouk <sup>4</sup>, Stefanos Dailianis <sup>5</sup> and Dimitris Vlastos <sup>5,\*</sup>

<sup>1</sup> Department of Environmental Engineering, University of Patras, Seferi 2, GR-30100 Agrinio, Greece; m.dormousoglou@upatras.gr (M.D.); iefthimiou@upatras.gr (I.E.); mantonop@upatras.gr (M.A.); marpapadaki@upatras.gr (M.P.)

<sup>2</sup> Hellenic Centre for Marine Research (HCMR), Institute of Marine Biology, Biotechnology and Aquaculture, Anavyssos, GR-19013 Athens, Greece

<sup>3</sup> Department of Chemical Engineering, Federal University of Paraná, Curitiba 81531-990, Brazil; fetzer@ufpr.br (D.L.F.); fabianehamerski@ufpr.br (F.H.); corazza@ufpr.br (M.L.C.)

<sup>4</sup> Santzouk Samir and Co. General Partnership, PANAX, Chrissostomou Smirnis 14, GR-30100 Agios Konstantinos, Greece; smsamir@otenet.gr

<sup>5</sup> Department of Biology, University of Patras, GR-26500 Patras, Greece; sdailianis@upatras.gr

\* Correspondence: dvlastos@upatras.gr; Tel: +30-2610969239

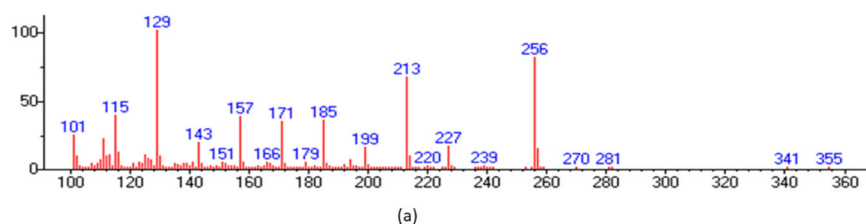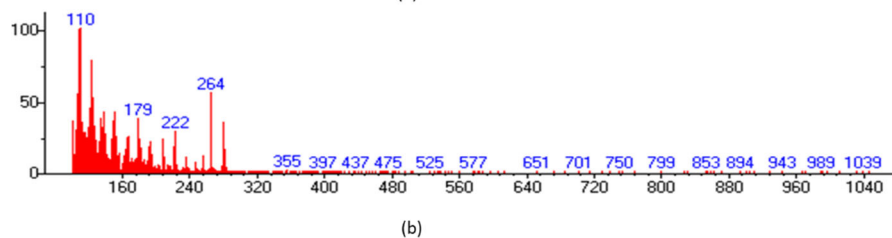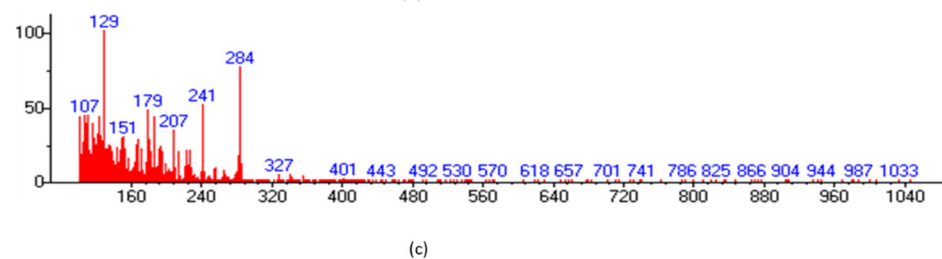

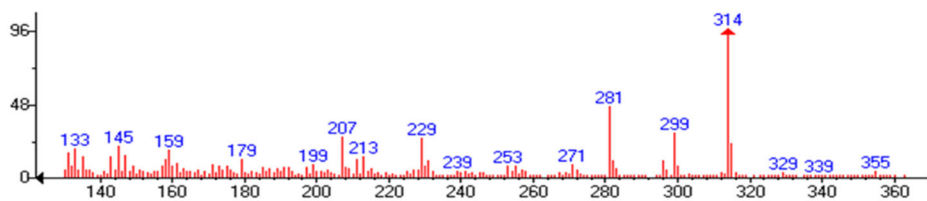

(d)

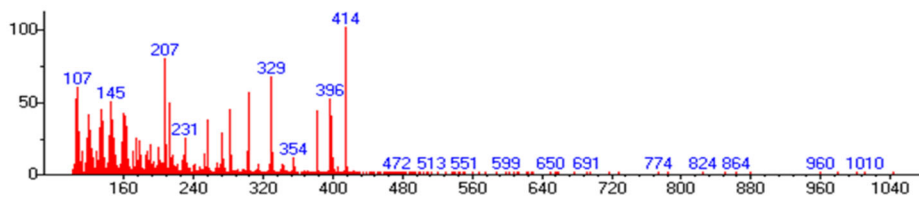

(e)

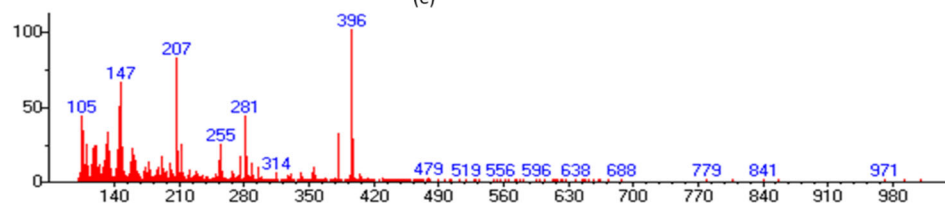

(f)

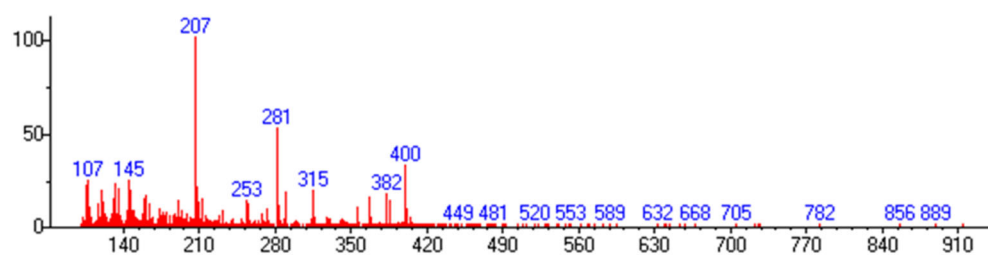

(g)

**Figure S1.** Mass spectra obtained by GC-MS analysis of (a) n-Hexadecanoic acid (Palmitic acid), (b) Oleic acid, (c) Hexadecanoic acid,14-methyl-, methyl ester, (d) Stigmasta-5,24(28)-dien-3ol (Isofucosterol), (e)  $\gamma$ -Sitosterol (Fucosterol), (f) Stigmastan-3,5-diene and (g) Campesterol.

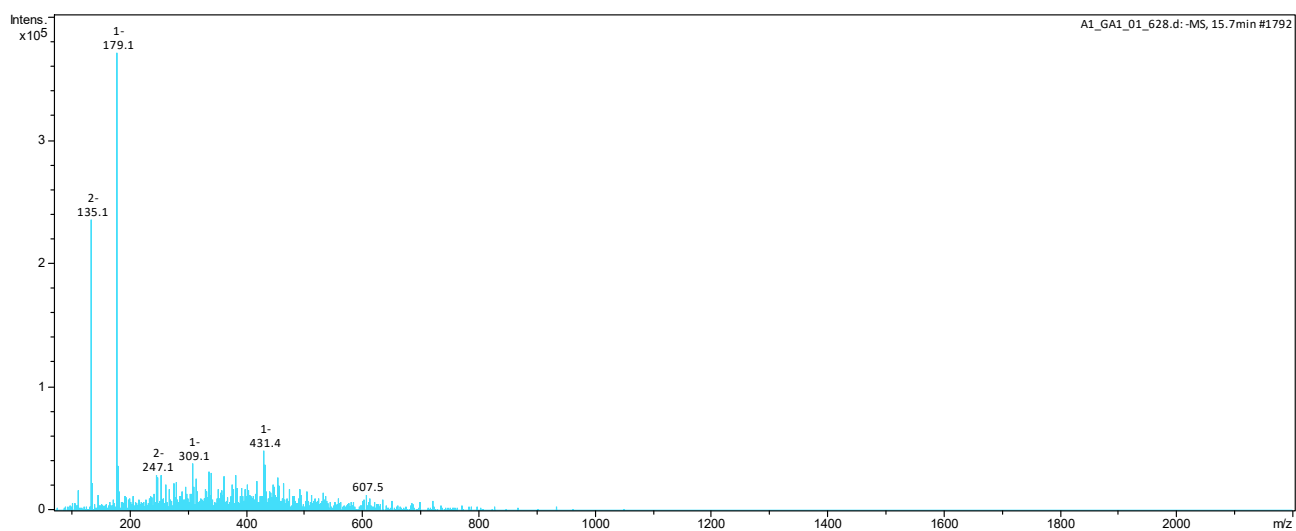

(a)

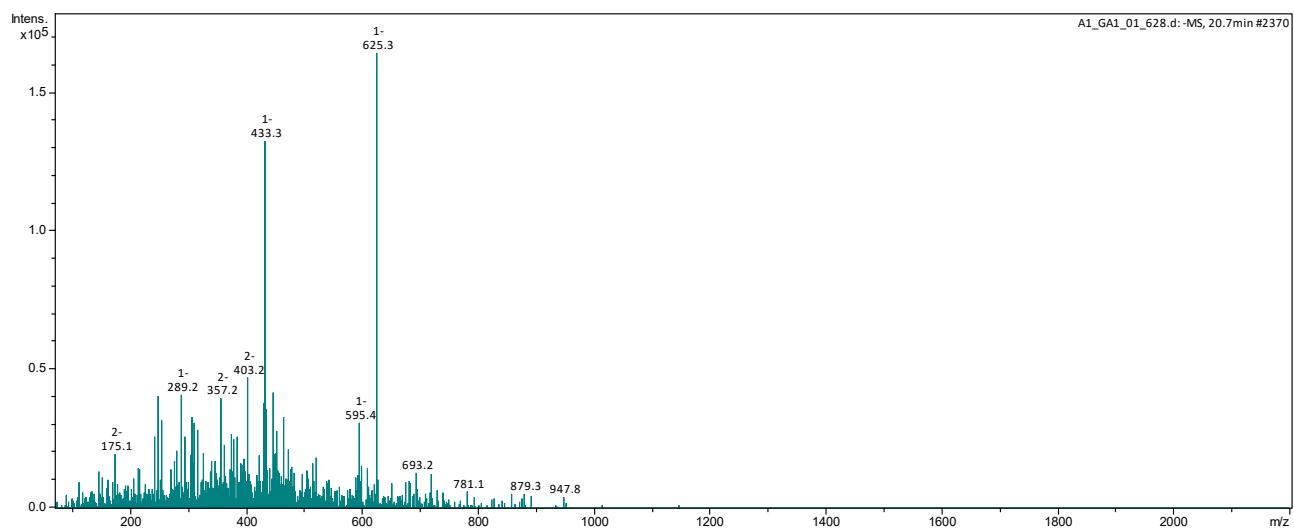

(b)

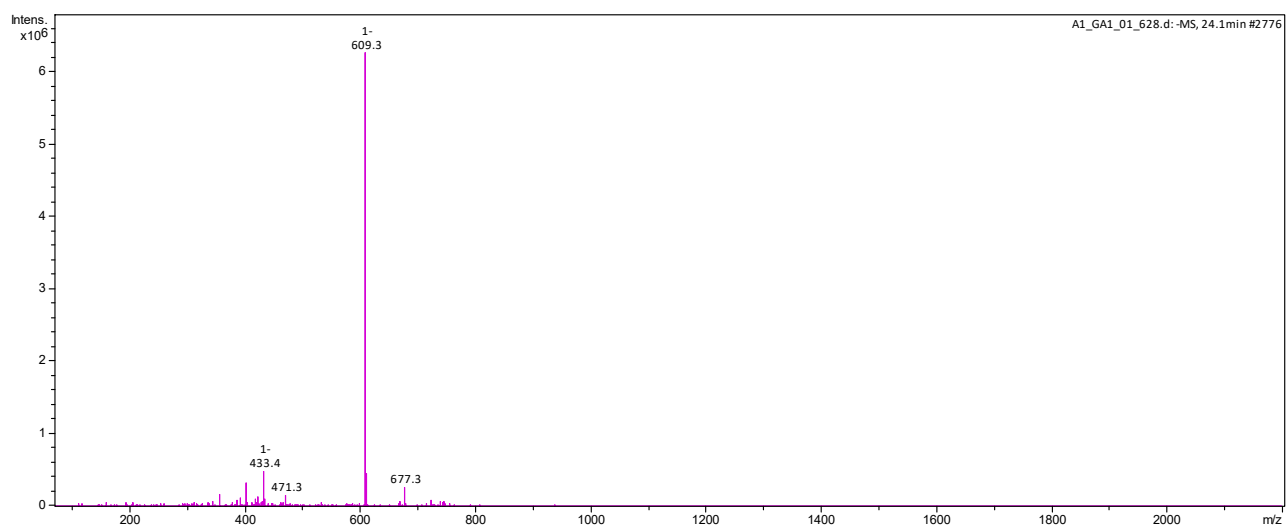

(c)

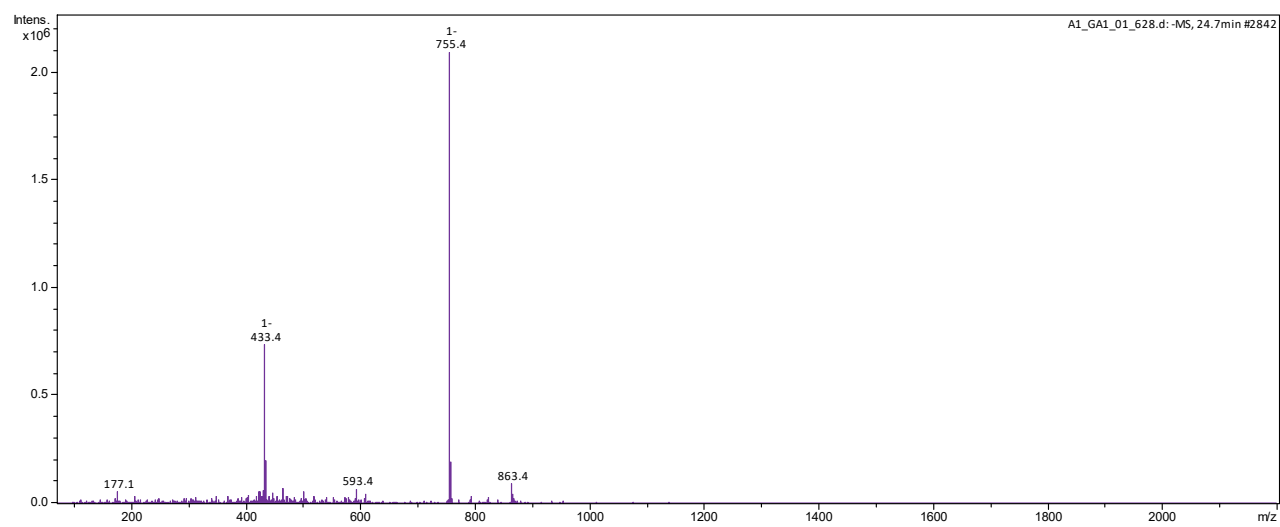

(d)

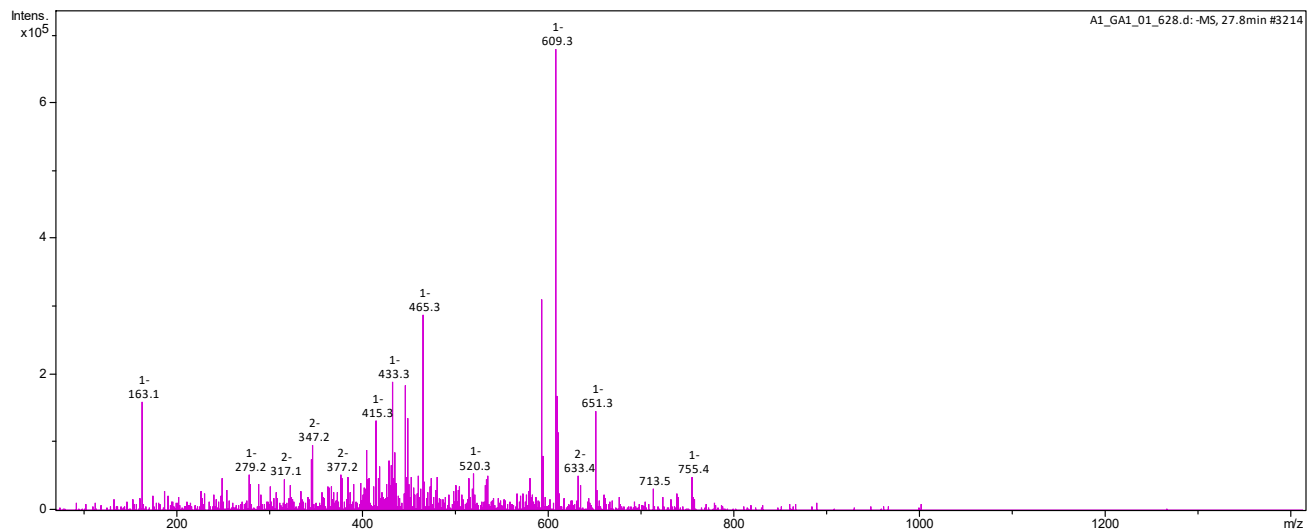

(c)

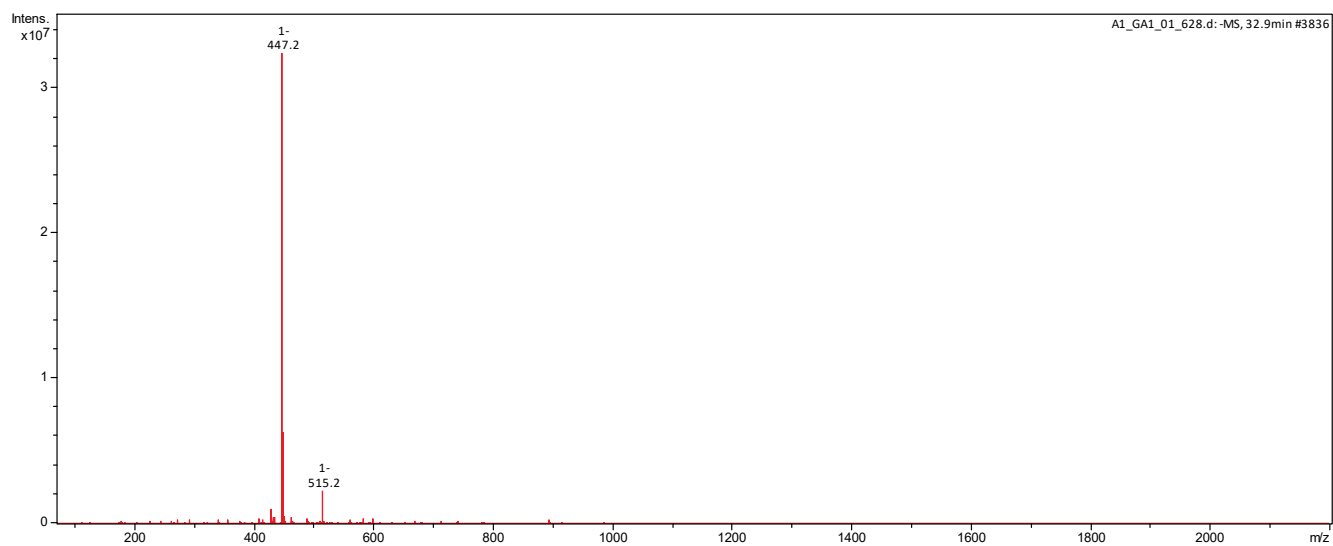

(f)

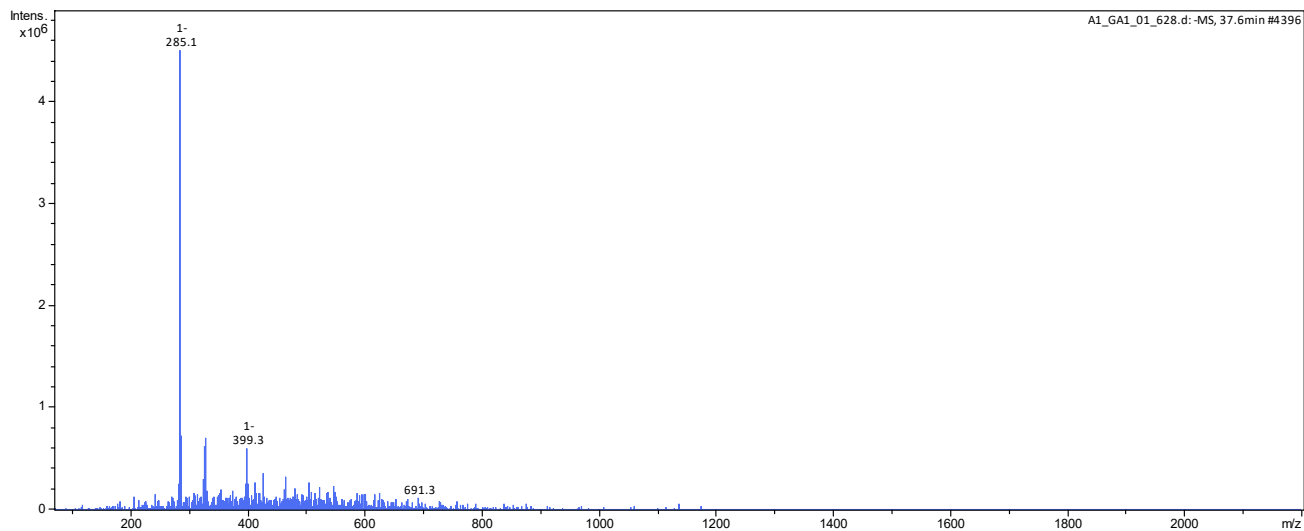

(g)

**Figure S2.** Mass spectra obtained by LC-MS in negative ionization mode of (a) Caffeic acid, (b) Quercetin-3,7-di-*O*-glucoside, (c) Kaempferol-3,7-di-*O*-glucoside, (d) Kaempferol-3-*O*-rutinoside-7-*O*-glucoside, (e) Kaempferol-3-*O*-sophoroside, (f) Kaempferol-3-*O*-glucoside and (g) Kaempferol.
